1 **A complete high quality nanopore-only assembly of an XDR *Mycobacterium tuberculosis***  
2 **Beijing lineage strain identifies novel variation in repetitive PE/PPE gene regions**

3 Arnold Bainomugisa<sup>1,2#</sup>, Tania Duarte<sup>1</sup>, Evelyn Lavu<sup>3</sup>, Sushil Pandey<sup>4</sup>, Chris Coulter<sup>4</sup>, Ben J.  
4 Marais<sup>5</sup>, Lachlan Coin<sup>1#</sup>

5 **Affiliation**

6 <sup>1</sup>Institute for Molecular Bioscience, The University of Queensland, Brisbane, Australia; <sup>2</sup>Faculty  
7 of Medicine, The University of Queensland, Brisbane, Australia; <sup>3</sup>Central Public Health  
8 Laboratory, Port Moresby, Papua New Guinea; <sup>4</sup>Queensland Mycobacteria Reference  
9 Laboratory, Brisbane, Australia; <sup>5</sup>Marie Bashir Institute for Infectious diseases and Biosecurity,  
10 University of Sydney, Sydney, Australia.

11 **#Corresponding Authors:**

12 1. Arnold Bainomugisa

13 Institute for Molecular Biosciences, The University of Queensland,  
14 St Lucia, Brisbane, Australia, Phone: +61470707634  
15 Email: a.bainomugisa@uq.edu.au

16 2. Assoc. Professor Lachlan Coin

17 Institute for Molecular Biosciences, The University of Queensland,  
18 St Lucia, Brisbane, Australia, Phone: +61733462649,  
19 Email: l.coin@imb.uq.edu.au

20

21 Abstract count: 200; Main text; Word count: 3143

22 **Abstract**

23 A better understanding of the genomic changes that facilitate the emergence and spread of drug  
24 resistant *M. tuberculosis* strains is required. Short-read sequencing methods have limited  
25 capacity to identify long, repetitive genomic regions and gene duplications. We sequenced an  
26 extensively drug resistant (XDR) Beijing sub-lineage 2.2.1.1 “epidemic strain” from the Western  
27 Province of Papua New Guinea using long-read sequencing (Oxford Nanopore MinION®). With  
28 up to 274 fold coverage from a single flow-cell, we assembled a 4404947bp circular genome  
29 containing 3670 coding sequences that include the highly repetitive PE/PPE genes. Comparison  
30 with Illumina reads indicated a base-level accuracy of 99.95%. Mutations known to confer drug  
31 resistance to first and second line drugs were identified and concurred with phenotypic resistance  
32 assays. We identified mutations in efflux pump genes (Rv0194), transporters (*secA1*, *glnQ*,  
33 *uspA*), cell wall biosynthesis genes (*pdk*, *mmpL*, *fadD*) and virulence genes (*mce*-gene family,  
34 *mycp1*) that may contribute to the drug resistance phenotype and successful transmission of this  
35 strain. Using the newly assembled genome as reference to map raw Illumina reads from  
36 representative *M. tuberculosis* lineages, we detect large insertions relative to the reference  
37 genome. We provide a fully annotated genome of a transmissible XDR *M. tuberculosis* strain  
38 from Papua New Guinea using Oxford Nanopore MinION sequencing and provide insight into  
39 genomic mechanisms of resistance and virulence.

40 **Word count: 200**

## 41 **Data Summary**

- 42 1. Sample Illumina and MinION sequencing reads generated and analyzed are available in  
43 NCBI under project accession number PRJNA386696  
44 ([https://www.ncbi.nlm.nih.gov/sra/?term= PRJNA386696](https://www.ncbi.nlm.nih.gov/sra/?term=PRJNA386696))
- 45 2. The assembled complete genome and its annotations are available in NCBI under  
46 accession number CP022704.1 (<https://www.ncbi.nlm.nih.gov/sra/?term=CP022704.1>)

47 **Impact statement**

48 We recently characterized a Modern Beijing lineage strain responsible for the drug resistance  
49 outbreaks in the Western province, Papua New Guinea. With some of the genomic markers  
50 responsible for its drug resistance and transmissibility are known, there is need to elucidate  
51 all molecular mechanisms that account for the resistance phenotype, virulence and  
52 transmission. Whole genome sequencing using short reads has widely been utilized to study  
53 MTB genome but it does not generally capture long repetitive regions as variants in these  
54 regions are eliminated using analysis. Illumina instruments are known to have a GC bias so  
55 that regions with high GC or AT rich are under sampled and this effect is exacerbated in  
56 MTB, which has approximately 65% GC content. In this study, we utilized Oxford  
57 Nanopore Technologies (ONT) MinION sequencing to assemble a high-quality complete  
58 genome of an extensively drug resistant strain of a modern Beijing lineage. We were able to  
59 assemble all PE/PPE (proline-glutamate/proline-proline-glutamate) gene families that  
60 have high GC content and repetitive in nature. We show the genomic utility of ONT in  
61 offering a more comprehensive understanding of genetic mechanisms that contribute to  
62 resistance, virulence and transmission. This is important for settings up predictive analytics  
63 platforms and services to support diagnostics and treatment.

## 64 **Introduction**

65 Globally, the tuberculosis (TB) incidence rate has shown a slow decline over the last two  
66 decades, although absolute case numbers continue to rise due to population growth, with an  
67 estimated 10.4 million new cases occurring in 2016 (1). TB control gains are threatened by the  
68 growing number of drug resistant strains recorded around the world (2). An estimated 490,000  
69 incident cases of multi-drug resistant (MDR) TB, which is resistance to at least isoniazid and  
70 rifampicin occurred in 2016, accounting for 374,000 deaths among HIV-positive patients (1).  
71 The incidence of extensively drug resistant (XDR) strains, which are MDR strains with  
72 additional resistance to at least one fluoroquinolone and second line injectable, is also on the rise  
73 (1). Further multiplication of drug resistance in strains that are already highly drug resistant  
74 could lead to programmatically incurable TB, where construction of a curative regimen might be  
75 impossible with existing treatment options (3, 4). Management of drug resistant tuberculosis  
76 places a major financial burden on health systems, which may be overwhelmed in settings with  
77 high disease burdens (3).

78 In the absence of lateral gene transfer (5), drug resistance in *M. tuberculosis* arises mainly  
79 from chromosomal mutations that are selected by chemotherapeutic pressure, which drives drug  
80 resistance multiplication and the ongoing evolution of drug resistant strains (6-8). Successful  
81 transmission of drug resistant strains results in clonal expansion and potential epidemic spread  
82 (9-11). The acquisition of resistance-conferring mutations has potential for epidemic spread if  
83 these drug resistant strains are readily transmissible (12, 13). The mechanisms underlying the  
84 development of highly transmissible XDR strains are not fully elucidated. One such mechanism  
85 is the induction of efflux pumps, which may lead to high level resistance in mycobacteria (14),  
86 without any metabolic compromise. While previous studies described efflux pumps genes and

87 identified mutations in some of these genes (15, 16), efflux pump a transmissible XDR strain  
88 have not been described.

89 Whole genome sequencing using short-reads has elucidated a large number of mutations  
90 associated with drug resistance, as well as compensatory mutations, but has limited capacity to  
91 resolve large structural variations, gene duplications or variations in repetitive regions (10, 17,  
92 18). Long-read sequencing could provide a more comprehensive understanding of the  
93 evolutionary mechanisms underlying the emergence of highly transmissible drug resistant strains  
94 (17). In principle, Oxford nanopore MinION sequencing technology offers read lengths that are  
95 only limited by the length of DNA presented and produces data in real-time (19). The small size,  
96 ease of use and cheap unit cost of the Oxford MinION<sup>®</sup> nanopore sequencer facilitates successful  
97 deployment in resource-limited settings, as has been achieved during the Ebola outbreak in West  
98 Africa (20). Although the potential of Oxford MinION<sup>®</sup> to detect drug resistance mutations in *M.*  
99 *tuberculosis* has been demonstrated, (21) its application for complete *M. tuberculosis* genome  
100 assembly has not been reported.

101 Papua New Guinea (PNG) has a high rate of drug resistant TB in its Western Province  
102 (22, 23). We recently characterized a drug resistant tuberculosis outbreak on Daru island, which  
103 is driven by a modern Beijing sub-lineage 2.2.1.1 strain (24). Whilst some genetic markers  
104 within the strain have been identified (24), the molecular mechanisms responsible for  
105 pathogenesis and virulence are not fully elucidated. Genomic regions like proline-glutamate (PE,  
106 99 loci) and proline-proline-glutamate (PPE, 69) genes are routinely excluded in genomic  
107 analysis of *M. tuberculosis* due to their repetitive nature and high GC content (9, 24, 25). A  
108 recent multinational study utilized 518 sample to study PE/PPE family genes and was able to  
109 assemble at least 120 out of the 168 genes for each sample (26).

110 With signature motifs near the N-terminus of PE/PPE amino acids, these genes are sub  
111 classified according to sequence features on the C-terminus. PE genes are divided into PE\_PGRS  
112 (polymorphic GC-rich sequence, 65 genes) and PE (no distinctive feature, 34 genes) while PPE  
113 genes is divided into PPE\_MPTR (major polymorphic tandem repeats, 23 genes), PPE\_SVP  
114 (Gxx-SVPxxW motif, 24 genes), PPE\_PPW (PxxPxxW motif, 10 genes) and PPE (no distinctive  
115 feature, 12 genes) (27). The existence of these subgroups highlights the diversity in the roles  
116 played by these genes (26). PE/PPE gene products are understood to be differentially expressed  
117 during infection (28) and have been implicated in immune invasion and virulence (29). We  
118 utilized Oxford MinION<sup>®</sup> to compose a comprehensive draft genome of an XDR strain including  
119 variable and repetitive sites like PE/PPE regions. This approach provides insight into the  
120 underlying mechanisms of drug resistance and identify key features associated with virulence  
121 and transmissibility. The fully assembled genome will serve as an ideal reference for ongoing  
122 MDR/XDR outbreak surveillance in Western province, PNG and far north Queensland.

## 123 **Materials and methods**

### 124 *Phenotypic susceptibility testing*

125 The strain was tested for resistance to first and second line drugs including: rifampicin  
126 (1.0 µg/ml), isoniazid (0.1 µg/ml; low-level and 0.4 µg/ml; high-level), streptomycin (1.0  
127 µg/ml), ethambutol (5.0 µg/ml), pyrazinamide (100 µg/ml) and second-line drugs amikacin (1.0  
128 µg/ml), capreomycin (2.5 µg/ml), kanamycin (2.5 µg/ml), ethionamide (5.0 µg/ml), ofloxacin  
129 (2.0 µg/ml), *p*-aminosalicylic acid (4.0 µg/ml) and cycloserine (50 µg/ml). The automated  
130 Bactec Mycobacterial Growth Indicator Tube (MGIT) 960 system (Becton Dickinson, New  
131 Jersey, USA) was used for first line drugs and the . Minimal inhibitory concentration assay for

132 second-line drugs was performed using Sensititre® (TREK diagnostic system, Ohio, USA)  
133 system for second line drugs.

#### 134 ***DNA extraction and quantification***

135 DNA was extracted from Lowenstein-Jensen (LJ) slopes cultured for 4 weeks at 37°C.  
136 DNA isolation was performed using mechanical and chemical methods. Briefly, 5 glass beads  
137 (0.7mm, SIGMA) were added to 200µl of PrepMan Ultra sample preparation reagent (Thermo  
138 Fisher scientific, Massachusetts, USA). Full loops of culture were added to the reagent and  
139 mixed well. The solution was dry heat incubated for 10 minutes at 95°C, followed by bead  
140 beating for 40s at 6.0m/s using mini-beadbeater-16 (BioSpec products, Bartlesville, USA). It was  
141 then centrifuged for 10 minutes at 13,000rpm before transferring 40µl of the supernatant into  
142 another vial. We added 45µl of 3M sodium acetate and 1ml of ice-cold ethanol (96%),  
143 centrifuged the solution at maximum speed for 15 minutes and removed the supernatant. We  
144 then added 1 ml of 70% ethanol, left it at room temperature for 1 minute, and again removed all  
145 the supernatant. The remaining pellet was dried for 15 minutes and re-suspended with 40µl of  
146 nuclease free water. The DNA was quantified using Nanodrop 8000 (Thermo fisher scientific,  
147 Massachusetts, USA) and Qubit dsDNA HS assay kit (Thermo fisher scientific, Massachusetts,  
148 USA)

#### 149 ***MinION® library preparation and sequencing***

150 DNA was purified using 0.4X Agencourt® AMPure® XP beads (Beckman Coulter) and  
151 fragment distribution size assessed using Agilent 4200TapeStation (Agilent, UK). Preparation  
152 for 1D gDNA library was performed using the SQK-LSK108 manufactures' instructions. We  
153 performed dA-tailing and end-repair using NEBNext Ultra II End-repair/dA-tail module with  
154 two step incubation times; 20 minutes each. Then, purification step using 0.7X Agencourt®



155 AMPure® XP beads (Beckman Coulter) was performed according to manufacturers'  
156 instructions. Ligation step was performed using NEB Blunt/ligase master mix module according  
157 to manufacturers' instructions and reaction incubated at room temperature for 20 minutes.  
158 Adaptor-ligated DNA was purified using 0.4X Agencourt® AMPure® XP beads (Beckman  
159 Coulter) following manufacturers' instructions but using Oxford Nanopore supplied buffers  
160 (adaptor bead binding and elution buffers). The library was ready for MinION® sequencing.

161 With the MinION MK1B device connected to the computer via a USB3, MinKNOW  
162 software (v.1.4.3) was started to perform quality control checks on pore activity and equilibrate  
163 the flow cell (FLO-MIN106, version R9.4). The library was combined with reagents supplied by  
164 Oxford Nanopore and loaded onto the flow cell following manufacturers' instructions, choosing  
165 a 48h sequencing procedure. Illumina data for the strain was available from our previous study.

#### 166 *MinION® and Illumina data analysis*

167 Raw files generated by MinKNOW were base called using Albacore (v2.0) to return  
168 Oxford Nanopore Technologies (ONT) fastq files. *De novo* genome assembly was performed  
169 using Canu (30) and the assembly was improved using consensus with nanopolish (methylation  
170 aware option) (31) and PILON (32). The assembly was circularized using Circulator v1.5.1 (33)  
171 and compared with the reference genome H37Rv (NC\_000962.3) using MUMMER (34).  
172 Genome annotation was performed using the NCBI pipeline (35) and circular representation of  
173 the genome viewed using Circos (36). Raw ONT and Illumina reads were mapped to H37Rv  
174 using BWA-MEM (37) and assessed genome and base coverage, including PE/PPE families  
175 using GATK (DepthOfCoverage) (38). We assessed single nucleotide polymorphisms (SNPs)  
176 within PE/PPE genes from nanopore and Illumina reads. In addition, representative raw Illumina  
177 reads from four *M. tuberculosis* lineages; Indo-Oceanic, East-Asian (including Beijing lineage),

178 East-African-Indian and Euro-American lineage (including H37Rv) from previous studies (24,  
179 25, 39, 40) were mapped to the draft genome and assessed for large deletions that differentiate  
180 the draft genome from other lineages.

### 181 *MinION variant and error analysis*

182 Using the reference genome H37Rv (NC\_000962.3), single nucleotide polymorphisms  
183 (SNPs) and small indels (<5bp) were called from ONT reads using nanopolish (31) and  
184 annotated using SnpEff (41). Polymorphisms in known drug resistance genes (including  
185 compensatory mutations) were analyzed. MycoBrowser (42) was utilized to analyze mutations in  
186 genes that are putatively involved in virulence, efflux pumps and cell transport. Illumina reads of  
187 the same strain were mapped onto the reference genome and variants called using GATK (38).  
188 Consensus SNPs from the two methods were assessed and ‘non-consensus SNPs’ from ONT  
189 reads were considered sequencing errors provided Illumina coverage was greater than 30X. This  
190 analysis excluded SNPs in variable regions like PE/PPE genes. Different software to generate  
191 variants from ONT and Illumina raw files was combined into an analysis pipeline (Fig. S1).

### 192 **Results**

193 In total, 373952 ONT reads passed base calling with N50 read length of 5073bp. The  
194 longest read was 33509bp. Genome assembly resulted in one contig of 4404947bp (G+C content  
195 65.5%), with base consistency similar to H37Rv (NC\_000962.3) (Fig. S2). NCBI annotation of  
196 the genome yielded a total of 3,670 coding DNA sequences (CDS), 45 tRNAs, 3 rRNAs (5S,  
197 16S, 23S) and 3 non-coding RNA (Fig. 1). Mapping of the ONT reads to H37Rv resulted in a  
198 coverage of 98.9% at average read depth of 273x (Table S1). Nearly all PE/PPE genes (167/168)  
199 were completely assembled with 100% coverage; only one (*wag22*; RV1759c) had incomplete  
200 (88%) coverage in our assembly relative to H37Rv. The average ONT read depth of PE/PPE

201 genes was 299.87 (IQR 285.91-311.36) (Fig. S3). Only 54.3% (92/168) of the PE/PPE genes  
202 were completely assembled from Illumina contigs at average sequence depth of x46.3 (Fig. S4).  
203 No Illumina reads covered the PE\_PGRS sub-family genes *wag22* and *PE\_PGRS57*.

204 We first evaluated SNP calling in the non-repetitive part of the reference genome by  
205 excluding variable (PE/PPE) regions. A total of 1254 SNPs and 122 small indels were called  
206 from ONT reads while 1098 SNPs and 105 small indels were called from Illumina reads when  
207 mapped to H37Rv. Of these, 1095 SNPs (574 non-synonymous and 402 synonymous) and 87  
208 small indels were identified by both approaches. 118 of 159 SNPs and 23 of 35 indels identified  
209 from MinION<sup>®</sup> but not Illumina were in regions of low Illumina coverage (<30x coverage). The  
210 remaining 41 and 12 SNPs and Indels respectively are potentially due to systematic base-calling  
211 errors (3.2% and 9.8 %). Three (0.2%) SNPs and 18 (14.7%) indels were identified by Illumina,  
212 but not by MinION<sup>®</sup> sequencing. As a conservative estimate considering all 194 ONT only calls  
213 (159 SNPs and 35 indels) as false positives and 21 Illumina only calls (3 SNPs and 18 Indels) as  
214 false negative, the error rate after consensus calling from ONT was 0.0048%. If we ignore  
215 inconsistent calls where Illumina coverage was low then the estimated error rate for base calling  
216 from ONT was reduced to 0.0036%

217 Given the likely importance of the variable PE/PPE genes in strain evolution we assessed  
218 the ability of MinION<sup>®</sup> and Illumina to call SNPs in this class of genes separately. From  
219 nanopore assembly, 158 SNPs were identified from 70 PE/PPE genes (42 PE and 28 PPE) with  
220 88 SNPs (55.6%) identified from the PE\_PGRS sub-family (Table S2). From the Illumina  
221 assembly, 124 SNPs from 45 PE/PPE genes (25 PE and 20 PPE) were identified of which 31  
222 SNPs (25%) were from PE\_PGRS sub-family. There were 81 SNPs (from 42 PE/PPE genes)

223 overlapping between ONT and Illumina with PPE54 having the highest number of overlapped  
224 SNPs (9) identified within one gene.

225       Phenotypic drug susceptibility results revealed the isolate to be extensively drug resistant  
226 with susceptibility to only amikacin, kanamycin, para-aminosalicylic acid (PAS) and  
227 cycloserine. Table 1 reflects phenotypic resistance, as well as mutations in genes known to  
228 confer drug resistance to first and second line drugs and recognized compensatory mutations.  
229 Genotypic drug resistance profiles concurred with phenotypic results. While 10 mutations were  
230 identified in seven genes that encode trans-membrane efflux pumps and transporter proteins  
231 (Table 2). Table 3 shows 16 SNPs identified in genes that encode virulence proteins; 8 (50%)  
232 were from the *mce*-gene family and a mutation within *mycPI* (p.Thr238Ala) was also noted. In  
233 addition, 27 SNPs were identified in three genes families involved in cell wall synthesis, with 17  
234 in *fadD*, 4 in *pks* and 3 in *mmp* gene families (Table S3).

235       Mapping of raw sequence reads from representative lineage 1 (Indo-Oceanic), 2 (East  
236 Asian, including ancient and modern Beijing), 3 (East-African-Indian) and 4 (Euro-American,  
237 including H37Rv) strains identified a 4490bp (2207042-2211532) region absent in Euro-  
238 American lineage strains (Fig. 2). Three previously assembled Beijing genomes from PacBio  
239 long reads identified the same region (40) (Fig. S5). Like is previous studies (43-45), annotation  
240 of this region was revealed to span 7 complete genes that encode proteins that include a  
241 nicotinamide adenine dinucleotide phosphate (NADP)-dependent oxidoreductase, an iron-  
242 regulated elongation factor (Tu), a PE-family protein while four genes encode uncharacterized  
243 proteins (Fig. 2).

244       A second smaller insertion (390bp, 3488211-3488601) was identified among Beijing  
245 lineage genomes relative to H37Rv and Euro-American lineages but varied in size as it was

246 835bp with respect to Indo-oceanic and East-African-Indian lineages (Fig. 2). Annotation  
247 showed a 654bp gene (3487881-3488534) in this region had part of the insertion sequence,  
248 323bp (3488211-3488534) towards the end. Phyre2 protein modelling (46) of the gene sequence  
249 with the insertion revealed PE8-PPE15 as template to construct to predict the protein structure as  
250 a PPE family protein (79% sequence modelled, 100% confidence) consisting of 73% alpha  
251 helices (Fig. S6). A blast search of this gene sequence revealed a 50% query coverage to four  
252 *Mycobacterium tuberculosis* H37Rv genomes (100% identification) and 100% query coverage to  
253 55 *Mycobacterium tuberculosis*, Lineage 2 genomes (Table S4).

## 254 **Discussion**

255 In this study, we utilized Oxford Nanopore MinION sequencing to assemble a  
256 comprehensive genome of a strain that is responsible for a drug resistant outbreaks in the  
257 Western Province of Papua New Guinea (24). The complete circular genome of this modern  
258 Beijing sub-lineage 2.2.1.1 strain revealed genetic determinants of drug resistance against first  
259 and second line TB drugs. Nanopore sequencing allowed us to assemble highly variable PE/PPE  
260 gene families with great fidelity. PE/PPE genes are thought to encode surface-associated cell  
261 wall proteins that may provide antigenic diversity and affect host immunity (28). Nanopore  
262 technology has been previously used to improve genome assemblies and resolution of repeat-rich  
263 regions in *Salmonella typhi* and *Escherichia coli* (18, 31) but not yet with *Mycobacterium*  
264 *tuberculosis*.

265 Twice as many SNPs in PE\_PGRS genes were identified as by ONT Minion versus  
266 Illumina sequencing (88 vs 31). PE\_PGRS gene mutations were under-represented in short-read  
267 sequencing, possibly due to their extra GC containing motifs that impact on the sequencing.  
268 Previous studies have identified a higher number of mutations within the PE\_PGRS sub-family

269 compared to other PE subfamilies, and attribute it to their involvement in antigenic variation and  
270 immune evasion from exposure to host immune system (26, 47). The *wag22* gene was also  
271 better represented by nanopore sequencing, with 88% coverage compared to no coverage from  
272 Illumina reads. Besides the high GC content, the difficulty of sequencing *wag22* has been further  
273 attributed to deletions at the beginning of the open reading frame (47). Unsurprisingly, PPE54  
274 which is a member of PPE\_MPTR (major polymorphic tandem repeat) sub-family had the  
275 highest number of mutations from ONT sequence. Previous studies have shown it to be involved  
276 in the ‘arrest’ of phagosome maturation to allow survival of the bacteria in the macrophages due  
277 to its long amino acid length at the C-terminal (48, 49). It has been postulated that PPE54 gene  
278 mutations may also play a role in development of isoniazid, rifampicin and ethambutol resistance  
279 (50), but we were unable to verify this given the presence of well-characterized drug resistance  
280 mutations.

281         There is growing interest in using Oxford Nanopore Technologies devices for real-time  
282 clinical utility as a cheap point-of-care TB diagnostic, with accurate identification of  
283 antimicrobial resistance profiles. Sequencing for drug resistance mutations directly from clinical  
284 samples has been completed within a 24 hours in patients with sputum smear-positive  
285 tuberculosis (21). In our study, nanopore sequencing of an XDR strain fully identified its drug  
286 resistance profile with complete phenotypic concordance. We were able to identify all relevant  
287 first line and second line drug resistance conferring SNPs using Oxford nanopore MinION  
288 sequencing. Compensatory mutations also detected in genes like *rpoC* (p.Val483Gly) and *ndh*  
289 (c.304delG) are thought to ameliorate the fitness cost associated with the XDR phenotype (51,  
290 52).

291 We also identified mutations in efflux pumps and transporter proteins, which might  
292 contribute to resistance phenotypes (53). Mutations in transporter proteins like ABC (ATP  
293 binding cassette) and MFS (Major Facilitator Super family) have been associated with drug  
294 resistance (54, 55). For example, mutations leading to overexpression of the ABC transporter  
295 Rv0194 leads to increased export of multiple drugs like streptomycin, vancomycin, and  
296 tetracycline (56). We identified two mutations in *uspA*, which is part of the three gene operon  
297 *uspABC* that encodes membrane-spanning subunits transporting amino-sugar substrates across  
298 the cell wall (57). Mutations found in Rv0194 have been associated with resistance to beta  
299 lactams antibiotics (56) and it's over expression with an XDR phenotype (58). Further research  
300 needs to be done to explore the association between efflux pump mutations, pump activity and  
301 drug resistance.

302 Mutations in co-localized genes like; *mmpL*, *pks* and *fadD* have been considered to a play  
303 a compensatory role to restore the fitness of drug resistant strains (59, 60) especially for drugs  
304 that target biosynthesis pathways of the mycobacterial cell wall like isoniazid, ethionamide (5)  
305 and ethambutol (61). *M. tuberculosis* contains 13 genes that encode *mmpL* proteins and 16 genes  
306 that encode polyketide synthases (*pks*) proteins that are involved in lipopolysaccharide and  
307 complex lipid biosynthesis. The functional cross talk between *pks* and *fadD* genes has been  
308 demonstrated in studies that showed how *pks13* and *fad32* form specific substrates that are  
309 precursors of mycolic acid biosynthesis (62). We identified mutations in all three genes although  
310 there was greater mutation variability within *fadD* genes. It remains to be determined how  
311 mutations in these co-localized genes influence cell wall lipid biosynthesis.

312 Insight into the factors that influence mycobacterial virulence is important for better  
313 appreciation of microbial pathogenesis and the identification of new treatment options. SNPs in

314 mammalian cell entry (*mce*) genes were prominent. Mce-family proteins are proposed to be  
315 involved in invasion and persistence of *M. tuberculosis* in host macrophages (63). This is related  
316 to the ability of these cell surface proteins to mediate bacterial uptake by mammalian cells,  
317 similar to those stimulated by invasive enteric bacteria (64). It has been demonstrated that a  
318 mutant *mce1A M. tuberculosis* strain is “hyper virulent” in mice (65). Comparative analysis  
319 among different *M. tuberculosis* strains could unveil characteristics related to host adaption (66).

320         Although *M. tuberculosis* has relatively limited genetic variation compared to other  
321 pathogenic bacteria, there is strain-related phenotypic variation in the protection provided by  
322 Bacille Calmette-Guerin (BCG) vaccination and clinical outcome (67). We didn’t find any large  
323 indel (>1kb) unique to the study strain but identified a large region (4490bp) with 7 coding  
324 sequences present in the draft genome and other reference genomes (lineage 1, 2 and 3) but  
325 absent in lineage 4 genomes including H37Rv. These have been previously described (43-45)  
326 and this further demonstrates the limitations of using H37Rv as the universal reference strain.  
327 The second smaller region within the draft genome but with variable sizes among the reference  
328 genomes highlights evidence of independent structural rearrangement among the different  
329 lineages. The identified PPE family protein unique to Beijing lineage 2 could contribute to  
330 phenotypic characteristics of this lineage. Such a comparative approach provides an opportunity  
331 to study lineage and strain specific differences, especially in the advent of long read sequencing  
332 with enhanced resolution of variable parts of the genome.

333         In conclusion, the assembly of a complete genome of a XDR “epidemic strain” using  
334 nanopore technology did not only provide proof of principle for future deployment of this  
335 technology in settings endemic for drug resistant tuberculosis but it also demonstrated the use of  
336 this technology in further understanding of *M. tuberculosis* genetics. It characterized the drug



337 resistance profile and potential virulence factors found in this strain, and provided a reference  
338 strain for future genome assembly and mapping.

### 339 **Data bibliography**

- 340 1. NCBI project accession number PRJNA386696 (2018)
- 341 2. GenBank accession numbers AP018034 (HN-205), AP018035 (HN-321), and  
342 AP018036(HN-506)-2017

### 343 **Funding**

344 This study was supported by funding from the Centre for Superbugs Solutions (610246),  
345 Institute for Molecular Bioscience.

### 346 **Ethic statement**

347 The isolate was selected from a previous study (24) with ethics clearance from the  
348 University of Queensland and the Papua New Guinea Medical Research Advisory Committee to  
349 perform detailed whole genome sequencing.

### 350 **Acknowledgements**

351 We thank the Papua New Guinea National Tuberculosis Program, Provincial Health Staff  
352 (Western Province) and staff of Queensland Mycobacterium Reference Laboratory for their  
353 assistance. This research was supported by the use of the NeCTAR Research Cloud, by QCIF  
354 and by the University of Queensland's Research Computing Centre (RCC). The NeCTAR  
355 Research Cloud is a collaborative Australian research platform supported by the National  
356 Collaborative Research Infrastructure Strategy.

357 **References**

- 358 1. World Health Organization. GLOBAL TUBERCULOSIS REPORT 2016. Switzerland:  
359 World Health Organization, Geneva, 2017.
- 360 2. Abubakar I, Zignol M, Falzon D, Raviglione M, Ditiu L, Masham S, et al. Drug-resistant  
361 tuberculosis: time for visionary political leadership. *The Lancet Infectious diseases*.  
362 2013;13(6):529-39.
- 363 3. Dheda K, Gumbo T, Maartens G, Dooley KE, McNerney R, Murray M, et al. The  
364 epidemiology, pathogenesis, transmission, diagnosis, and management of multidrug-resistant,  
365 extensively drug-resistant, and incurable tuberculosis. *The Lancet Respiratory medicine*. 2017.
- 366 4. Udwardia ZF. MDR, XDR, TDR tuberculosis: ominous progression. *Thorax*.  
367 2012;67(4):286-8.
- 368 5. Zhang Y, Yew WW. Mechanisms of drug resistance in *Mycobacterium tuberculosis*:  
369 update 2015. *The international journal of tuberculosis and lung disease : the official journal of*  
370 *the International Union against Tuberculosis and Lung Disease*. 2015;19(11):1276-89.
- 371 6. Eldholm V, Monteserin J, Rieux A, Lopez B, Sobkowiak B, Ritacco V, et al. Four  
372 decades of transmission of a multidrug-resistant *Mycobacterium tuberculosis* outbreak strain.  
373 *Nature communications*. 2015;6:7119.
- 374 7. Ioerger TR, Feng Y, Chen X, Dobos KM, Victor TC, Streicher EM, et al. The non-  
375 clonality of drug resistance in Beijing-genotype isolates of *Mycobacterium tuberculosis* from the  
376 Western Cape of South Africa. *BMC genomics*. 2010;11:670.
- 377 8. Didelot X, Walker AS, Peto TE, Crook DW, Wilson DJ. Within-host evolution of  
378 bacterial pathogens. *Nature reviews Microbiology*. 2016;14(3):150-62.

- 379 9. Cohen KA, Abeel T, Manson McGuire A, Desjardins CA, Munsamy V, Shea TP, et al.  
380 Evolution of Extensively Drug-Resistant Tuberculosis over Four Decades: Whole Genome  
381 Sequencing and Dating Analysis of Mycobacterium tuberculosis Isolates from KwaZulu-Natal.  
382 PLoS medicine. 2015;12(9):e1001880.
- 383 10. Casali N, Nikolayevskyy V, Balabanova Y, Harris SR, Ignatyeva O, Kontsevaya I, et al.  
384 Evolution and transmission of drug-resistant tuberculosis in a Russian population. Nature  
385 genetics. 2014;46(3):279-86.
- 386 11. Casali N, Nikolayevskyy V, Balabanova Y, Ignatyeva O, Kontsevaya I, Harris SR, et al.  
387 Microevolution of extensively drug-resistant tuberculosis in Russia. Genome research.  
388 2012;22(4):735-45.
- 389 12. McBryde ES, Meehan MT, Doan TN, Ragonnet R, Marais BJ, Guernier V, et al. The risk  
390 of global epidemic replacement with drug-resistant Mycobacterium tuberculosis strains.  
391 International journal of infectious diseases : IJID : official publication of the International  
392 Society for Infectious Diseases. 2017;56:14-20.
- 393 13. Marais BJ, Mlambo CK, Rastogi N, Zozio T, Duse AG, Victor TC, et al. Epidemic  
394 spread of multidrug-resistant tuberculosis in Johannesburg, South Africa. Journal of clinical  
395 microbiology. 2013;51(6):1818-25.
- 396 14. Schmalstieg AM, Srivastava S, Belkaya S, Deshpande D, Meek C, Leff R, et al. The  
397 antibiotic resistance arrow of time: efflux pump induction is a general first step in the evolution  
398 of mycobacterial drug resistance. Antimicrobial agents and chemotherapy. 2012;56(9):4806-15.
- 399 15. Garima K, Pathak R, Tandon R, Rathor N, Sinha R, Bose M, et al. Differential expression  
400 of efflux pump genes of Mycobacterium tuberculosis in response to varied subinhibitory  
401 concentrations of antituberculosis agents. Tuberculosis. 2015;95(2):155-61.

- 402 16. Ali A, Hasan Z, McNerney R, Mallard K, Hill-Cawthorne G, Coll F, et al. Whole genome  
403 sequencing based characterization of extensively drug-resistant *Mycobacterium tuberculosis*  
404 isolates from Pakistan. *PloS one*. 2015;10(2):e0117771.
- 405 17. Didelot X, Bowden R, Wilson DJ, Peto TEA, Crook DW. Transforming clinical  
406 microbiology with bacterial genome sequencing. *Nature reviews Genetics*. 2012;13(9):601-12.
- 407 18. Ashton PM, Nair S, Dallman T, Rubino S, Rabsch W, Mwaigwisya S, et al. MinION  
408 nanopore sequencing identifies the position and structure of a bacterial antibiotic resistance  
409 island. *Nature biotechnology*. 2015;33(3):296-300.
- 410 19. Laver T, Harrison J, O'Neill PA, Moore K, Farbos A, Paszkiewicz K, et al. Assessing the  
411 performance of the Oxford Nanopore Technologies MinION. *Biomolecular detection and*  
412 *quantification*. 2015;3:1-8.
- 413 20. Quick J, Loman NJ, Duraffour S, Simpson JT, Severi E, Cowley L, et al. Real-time,  
414 portable genome sequencing for Ebola surveillance. *Nature*. 2016;530(7589):228-32.
- 415 21. Votintseva AA, Bradley P, Pankhurst L, Del Ojo Elias C, Loose M, Nilgiriwala K, et al.  
416 Same-Day Diagnostic and Surveillance Data for Tuberculosis via Whole-Genome Sequencing of  
417 Direct Respiratory Samples. *Journal of clinical microbiology*. 2017;55(5):1285-98.
- 418 22. Organization. WH. Global tuberculosis control : WHO report. Geneva: Global  
419 Tuberculosis Programme. p. 15 volumes.
- 420 23. Aia P, Kal M, Lavu E, John LN, Johnson K, Coulter C, et al. The Burden of Drug-  
421 Resistant Tuberculosis in Papua New Guinea: Results of a Large Population-Based Survey. *PloS*  
422 *one*. 2016;11(3):e0149806.
- 423 24. Bainomugisa A, Lavu E, Hiashiri S, Majumdar S, Honjepari A, Moke R, et al. Multi-  
424 clonal evolution of multi-drug-resistant/extensively drug-resistant *Mycobacterium tuberculosis*

- 425 in a high-prevalence setting of Papua New Guinea for over three decades. *Microbial genomics*.  
426 2018.
- 427 25. Merker M, Blin C, Mona S, Duforet-Frebourg N, Lecher S, Willery E, et al. Evolutionary  
428 history and global spread of the *Mycobacterium tuberculosis* Beijing lineage. *Nature genetics*.  
429 2015;47(3):242-9.
- 430 26. Phelan JE, Coll F, Bergval I, Anthony RM, Warren R, Sampson SL, et al. Recombination  
431 in *pe/ppe* genes contributes to genetic variation in *Mycobacterium tuberculosis* lineages. *BMC*  
432 *genomics*. 2016;17:151.
- 433 27. Fishbein S, van Wyk N, Warren RM, Sampson SL. Phylogeny to function: PE/PPE  
434 protein evolution and impact on *Mycobacterium tuberculosis* pathogenicity. *Molecular*  
435 *microbiology*. 2015;96(5):901-16.
- 436 28. Mohareer K, Tundup S, Hasnain SE. Transcriptional regulation of *Mycobacterium*  
437 *tuberculosis* PE/PPE genes: a molecular switch to virulence? *Journal of molecular microbiology*  
438 *and biotechnology*. 2011;21(3-4):97-109.
- 439 29. Singh KK, Zhang X, Patibandla AS, Chien P, Jr., Laal S. Antigens of *Mycobacterium*  
440 *tuberculosis* expressed during preclinical tuberculosis: serological immunodominance of proteins  
441 with repetitive amino acid sequences. *Infection and immunity*. 2001;69(6):4185-91.
- 442 30. Koren S, Walenz BP, Berlin K, Miller JR, Bergman NH, Phillippy AM. Canu: scalable  
443 and accurate long-read assembly via adaptive k-mer weighting and repeat separation. *Genome*  
444 *research*. 2017;27(5):722-36.
- 445 31. Loman NJ, Quick J, Simpson JT. A complete bacterial genome assembled de novo using  
446 only nanopore sequencing data. *Nature methods*. 2015;12(8):733-5.

- 447 32. Walker BJ, Abeel T, Shea T, Priest M, Abouelliel A, Sakthikumar S, et al. Pilon: an  
448 integrated tool for comprehensive microbial variant detection and genome assembly  
449 improvement. *PLoS one*. 2014;9(11):e112963.
- 450 33. Hunt M, Silva ND, Otto TD, Parkhill J, Keane JA, Harris SR. Circlator: automated  
451 circularization of genome assemblies using long sequencing reads. *Genome biology*.  
452 2015;16:294.
- 453 34. Kurtz S, Phillippy A, Delcher AL, Smoot M, Shumway M, Antonescu C, et al. Versatile  
454 and open software for comparing large genomes. *Genome biology*. 2004;5(2):R12.
- 455 35. Angiuoli SV, Gussman A, Klimke W, Cochrane G, Field D, Garrity G, et al. Toward an  
456 online repository of Standard Operating Procedures (SOPs) for (meta)genomic annotation.  
457 *Omics : a journal of integrative biology*. 2008;12(2):137-41.
- 458 36. Krzywinski M, Schein J, Birol I, Connors J, Gascoyne R, Horsman D, et al. Circos: an  
459 information aesthetic for comparative genomics. *Genome research*. 2009;19(9):1639-45.
- 460 37. Li H. Aligning sequence reads, clone sequences and assembly contigs with BWA-MEM.  
461 arXiv. 2013;:1303.3997v1 [q-bio.GN].
- 462 38. McKenna A, Hanna M, Banks E, Sivachenko A, Cibulskis K, Kernytsky A, et al. The  
463 Genome Analysis Toolkit: a MapReduce framework for analyzing next-generation DNA  
464 sequencing data. *Genome research*. 2010;20(9):1297-303.
- 465 39. Guerra-Assuncao JA, Crampin AC, Houben RM, Mzembe T, Mallard K, Coll F, et al.  
466 Large-scale whole genome sequencing of *M. tuberculosis* provides insights into transmission in a  
467 high prevalence area. *eLife*. 2015;4.
- 468 40. Wada T, Hijikata M, Maeda S, Hang NTL, Thuong PH, Hoang NP, et al. Complete  
469 Genome Sequences of Three Representative *Mycobacterium tuberculosis* Beijing Family Strains

- 470 Belonging to Distinct Genotype Clusters in Hanoi, Vietnam, during 2007 to 2009. *Genome*  
471 *announcements*. 2017;5(27).
- 472 41. Cingolani P, Platts A, Wang le L, Coon M, Nguyen T, Wang L, et al. A program for  
473 annotating and predicting the effects of single nucleotide polymorphisms, SnpEff: SNPs in the  
474 genome of *Drosophila melanogaster* strain w1118; iso-2; iso-3. *Fly*. 2012;6(2):80-92.
- 475 42. Kapopoulou A, Lew JM, Cole ST. The MycoBrowser portal: a comprehensive and  
476 manually annotated resource for mycobacterial genomes. *Tuberculosis*. 2011;91(1):8-13.
- 477 43. Periwal V, Patowary A, Vellarikkal SK, Gupta A, Singh M, Mittal A, et al. Comparative  
478 whole-genome analysis of clinical isolates reveals characteristic architecture of *Mycobacterium*  
479 *tuberculosis* pangenome. *PloS one*. 2015;10(4):e0122979.
- 480 44. O'Toole RF, Gautam SS. Limitations of the *Mycobacterium tuberculosis* reference  
481 genome H37Rv in the detection of virulence-related loci. *Genomics*. 2017.
- 482 45. Gautam SS, Mac Aogain M, Bower JE, Basu I, O'Toole RF. Differential carriage of  
483 virulence-associated loci in the New Zealand Rangipo outbreak strain of *Mycobacterium*  
484 *tuberculosis*. *Infectious diseases*. 2017;49(9):680-8.
- 485 46. Kelley LA, Mezulis S, Yates CM, Wass MN, Sternberg MJ. The Phyre2 web portal for  
486 protein modeling, prediction and analysis. *Nature protocols*. 2015;10(6):845-58.
- 487 47. Copin R, Coscolla M, Seiffert SN, Bothamley G, Sutherland J, Mbayo G, et al. Sequence  
488 diversity in the *pe\_pgrs* genes of *Mycobacterium tuberculosis* is independent of human T cell  
489 recognition. *mBio*. 2014;5(1):e00960-13.
- 490 48. Sampson SL. Mycobacterial PE/PPE proteins at the host-pathogen interface. *Clinical &*  
491 *developmental immunology*. 2011;2011:497203.

- 492 49. Brodin P, Poquet Y, Levillain F, Peguillet I, Larrouy-Maumus G, Gilleron M, et al. High  
493 content phenotypic cell-based visual screen identifies *Mycobacterium tuberculosis* acyltrehalose-  
494 containing glycolipids involved in phagosome remodeling. *PLoS pathogens*.  
495 2010;6(9):e1001100.
- 496 50. Cui ZJ, Yang QY, Zhang HY, Zhu Q, Zhang QY. Bioinformatics Identification of Drug  
497 Resistance-Associated Gene Pairs in *Mycobacterium tuberculosis*. *International journal of*  
498 *molecular sciences*. 2016;17(9).
- 499 51. Comas I, Borrell S, Roetzer A, Rose G, Malla B, Kato-Maeda M, et al. Whole-genome  
500 sequencing of rifampicin-resistant *Mycobacterium tuberculosis* strains identifies compensatory  
501 mutations in RNA polymerase genes. *Nature genetics*. 2012;44(1):106-10.
- 502 52. Bainomugisa A, Lavu E, Hiashiri S, Majumdar S, Honjepari A, Moke R, et al. Multi-  
503 clonal evolution of MDR/XDR *M. tuberculosis* in a high prevalence setting in Papua New  
504 Guinea over three decades. *bioRxiv*. 2017.
- 505 53. Kanji A, Hasan R, Zhang Y, Shi W, Imtiaz K, Iqbal K, et al. Increased expression of  
506 efflux pump genes in extensively drug-resistant isolates of *Mycobacterium tuberculosis*.  
507 *International journal of mycobacteriology*. 2016;5 Suppl 1:S150.
- 508 54. Liu J, Takiff HE, Nikaido H. Active efflux of fluoroquinolones in *Mycobacterium*  
509 *smegmatis* mediated by LfrA, a multidrug efflux pump. *Journal of bacteriology*.  
510 1996;178(13):3791-5.
- 511 55. De Rossi E, Arrigo P, Bellinzoni M, Silva PA, Martin C, Ainsa JA, et al. The multidrug  
512 transporters belonging to major facilitator superfamily in *Mycobacterium tuberculosis*.  
513 *Molecular medicine*. 2002;8(11):714-24.



- 514 56. Danilchanka O, Mailaender C, Niederweis M. Identification of a novel multidrug efflux  
515 pump of *Mycobacterium tuberculosis*. *Antimicrobial agents and chemotherapy*.  
516 2008;52(7):2503-11.
- 517 57. Fullam E, Prokes I, Futterer K, Besra GS. Structural and functional analysis of the solute-  
518 binding protein UspC from *Mycobacterium tuberculosis* that is specific for amino sugars. *Open*  
519 *biology*. 2016;6(6).
- 520 58. Kanji A, Hasan R, Ali A, Zaver A, Zhang Y, Imtiaz K, et al. Single nucleotide  
521 polymorphisms in efflux pumps genes in extensively drug resistant *Mycobacterium tuberculosis*  
522 isolates from Pakistan. *Tuberculosis*. 2017;107(Supplement C):20-30.
- 523 59. Zhang H, Li D, Zhao L, Fleming J, Lin N, Wang T, et al. Genome sequencing of 161  
524 *Mycobacterium tuberculosis* isolates from China identifies genes and intergenic regions  
525 associated with drug resistance. *Nature genetics*. 2013;45(10):1255-60.
- 526 60. Kuan CS, Chan CL, Yew SM, Toh YF, Khoo JS, Chong J, et al. Genome Analysis of the  
527 First Extensively Drug-Resistant (XDR) *Mycobacterium tuberculosis* in Malaysia Provides  
528 Insights into the Genetic Basis of Its Biology and Drug Resistance. *PloS one*.  
529 2015;10(6):e0131694.
- 530 61. Birch HL, Alderwick LJ, Bhatt A, Rittmann D, Krumbach K, Singh A, et al. Biosynthesis  
531 of mycobacterial arabinogalactan: identification of a novel alpha(1->3)  
532 arabinofuranosyltransferase. *Molecular microbiology*. 2008;69(5):1191-206.
- 533 62. Gavalda S, Leger M, van der Rest B, Stella A, Bardou F, Montrozier H, et al. The  
534 Pks13/FadD32 crosstalk for the biosynthesis of mycolic acids in *Mycobacterium tuberculosis*.  
535 *The Journal of biological chemistry*. 2009;284(29):19255-64.

- 536 63. Casali N, Riley LW. A phylogenomic analysis of the Actinomycetales mce operons.  
537 BMC genomics. 2007;8:60.
- 538 64. Bliska JB, Galan JE, Falkow S. Signal transduction in the mammalian cell during  
539 bacterial attachment and entry. Cell. 1993;73(5):903-20.
- 540 65. Shimono N, Morici L, Casali N, Cantrell S, Sidders B, Ehrh S, et al. Hypervirulent mutant  
541 of Mycobacterium tuberculosis resulting from disruption of the mce1 operon. Proceedings of the  
542 National Academy of Sciences of the United States of America. 2003;100(26):15918-23.
- 543 66. Cubillos-Ruiz A, Morales J, Zambrano MM. Analysis of the genetic variation in  
544 Mycobacterium tuberculosis strains by multiple genome alignments. BMC research notes.  
545 2008;1:110.
- 546 67. Gagneux S, Small PM. Global phylogeography of Mycobacterium tuberculosis and  
547 implications for tuberculosis product development. The Lancet Infectious diseases.  
548 2007;7(5):328-37.
- 549

550 **Figures and tables**

551 **Main text**

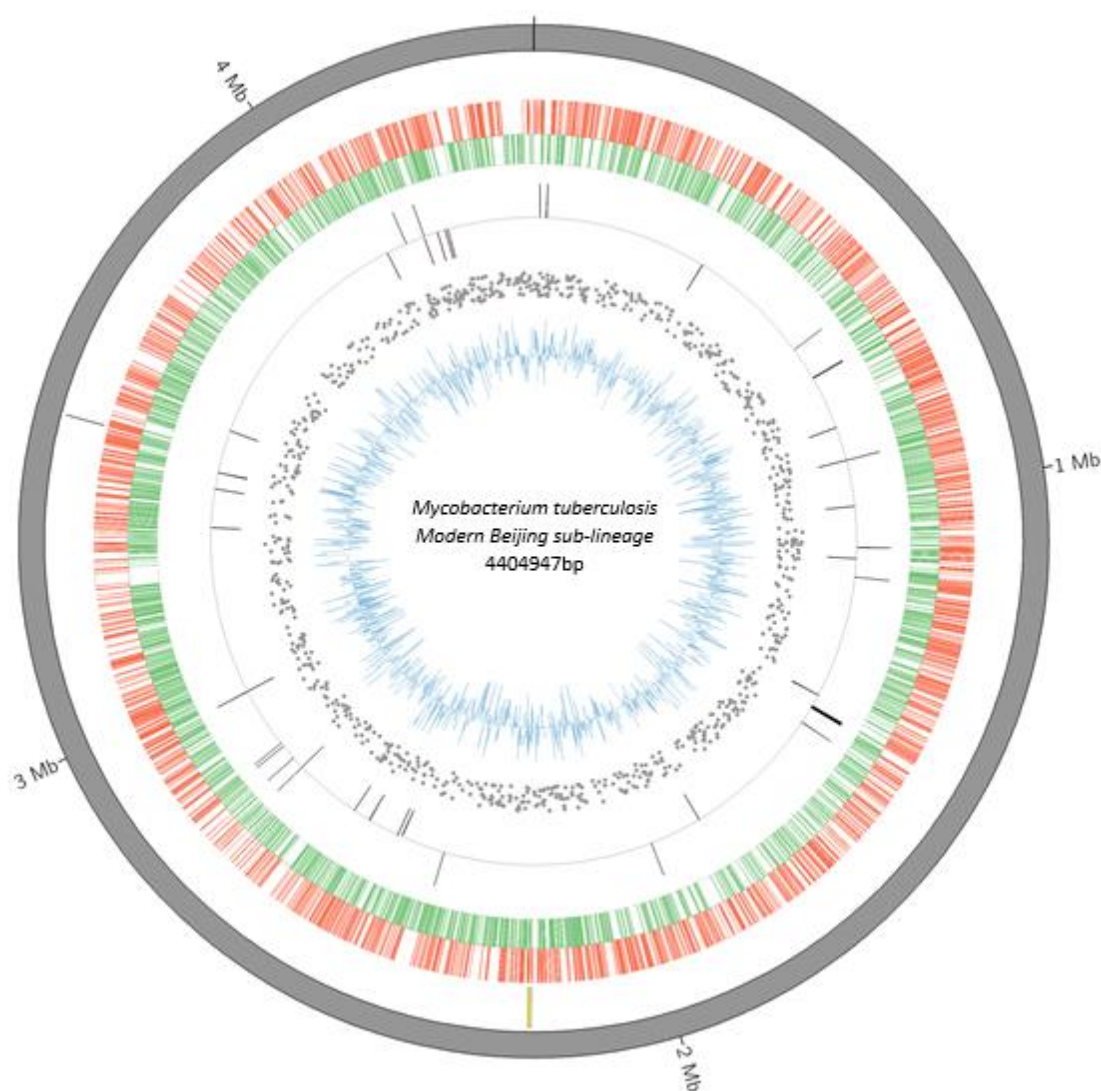

552

553 **Fig. 1:** Circular representation of the drafted XDR genome from Western Province, Papua New  
554 Guinea (modern Beijing sub-lineage 2.2.1.1 strain) with gene annotations. From the inner to  
555 outer ring: Blue - GC content of coding sequence; Scattered grey - SNPs relative to H37Rv; Grey  
556 bars - reverse and forward *rRNA*; Green - reverse coding sequences; Red - forward coding

557 sequences; Yellow bars - unique regions compared to H37Rv; Grey outside ring - assembled  
558 contig (grey). Mb-million base pairs; XDR – extensively drug resistant  
559

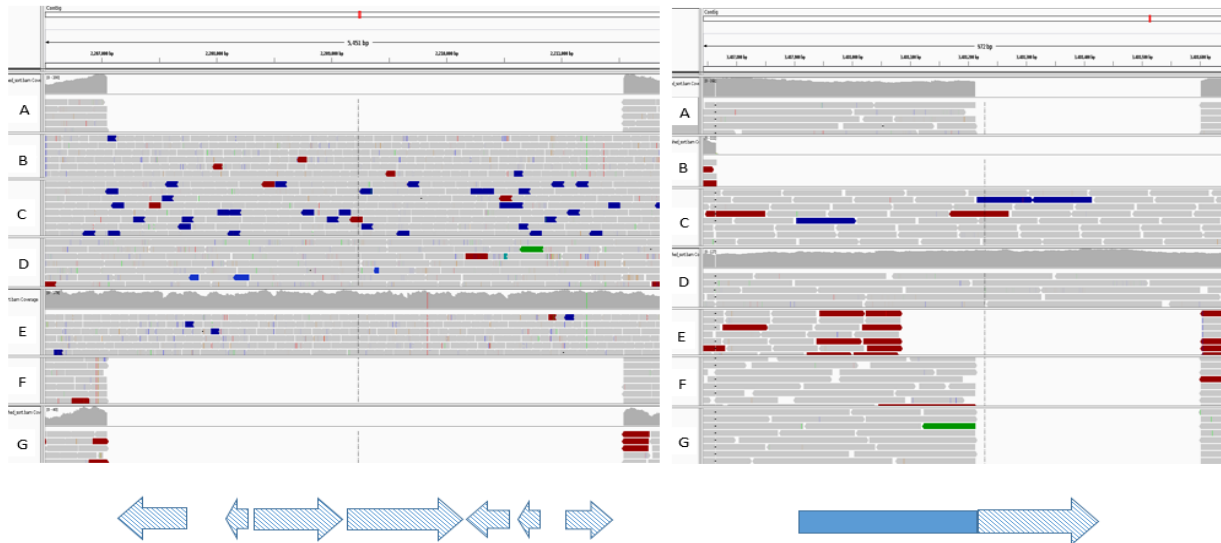

560

561 **Fig. 2:** Integrative Genomic Viewer (IGV) of Illumina reads from different *M. tuberculosis*  
562 lineages (A- *M. tuberculosis* H37Rv, B-Indo-oceanic, C-Ancient Beijing, D-Modern Beijing, E-  
563 East African Indian, F&G-Euro American) mapped on the ONT draft genome highlighting the  
564 large insertions within the draft genome. On the left-4490bp insertion (2207042-2211532)  
565 spanning 7 annotated genes (blue checked arrows-NADH-dependent oxidoreductase, Iron-  
566 regulated elongation factor-tu, PE family protein and hypothetical/uncharacterized proteins). On  
567 the right-390bp insertion relative to H37Rv (3488211-3488601) spanning 323bp (checked) at the  
568 end of a 654bp coding sequence. ONT – Oxford Nanopore Technologies

569 **Table 1:** Mutations in candidate drug resistance genes identified from ONT assembly of XDR

570 Beijing sub-lineage 2.2.1.1 strain

| <b>Drug</b>     | <b>Invitro phenotype</b> | <b>Investigated genes</b>                                                      | <b>Genes (mutation)</b>   |
|-----------------|--------------------------|--------------------------------------------------------------------------------|---------------------------|
| Isoniazid       | Resistant                | <i>fabG1-inhA, inhA, katG, ndh, furA, oxyR, aphC, fadE24, srmR, kasA, mshA</i> | <i>fabG1-inhA</i> (C-15T) |
|                 |                          |                                                                                | <i>inhA</i> (p.Ile21Val)  |
|                 |                          |                                                                                | <i>ndh</i> (delG304)      |
| Rifampicin      | Resistant                | <i>rpoB, rpoC, rpoA, rpoD</i>                                                  | <i>rpoB</i> (p.Ser450Leu) |
|                 |                          |                                                                                | <i>rpoC</i> (p.Val483Gly) |
| Ethambutol      | Resistant                | <i>embB, embC, embA, ubiA, embR, iniA, iniC, manB</i>                          | <i>embB</i> (p.Met306Val) |
| Pyrazinamide    | Resistant                | <i>pncA, rpsA, panD</i>                                                        | <i>pncA</i> (p.Tyr103Asp) |
| Streptomycin    | Resistant                | <i>rpsL, gidB, rrs</i>                                                         | <i>rpsL</i> (p.Lys43Arg)  |
|                 |                          |                                                                                | <i>gidB</i> (p.Leu91Pro)  |
| Ethionamide     | Resistant                | <i>fabG1-inhA, ethA, ethR</i>                                                  | <i>fabG1-inhA</i> (C-15T) |
| Fluoroquinolone | Resistant                | <i>gyrA, gyrB</i>                                                              | <i>gyrA</i> (p.Asp94Gly)  |
| Amikacin        | Susceptible              | <i>rrs, whib7, gidB</i>                                                        | nil                       |
| Kanamycin       | Susceptible              | <i>Rv2417c-eis, whiB7, rrs, gidB</i>                                           | nil                       |
| Capreomycin     | Resistant                | <i>tlyA, whiB7, rrs, gidB</i>                                                  | <i>tlyA</i> (ins397C)     |
| PAS             | Susceptible              | <i>ribD, thyA, dfrA, folC</i>                                                  | nil                       |
| Cycloserine     | Susceptible              | <i>alr, ddl, cycA</i>                                                          | nil                       |

571

572 ONT – Oxford Nanopore Technologies; XDR – Extensively drug resistant; PZA – Pyrazinamide;

573 PAS - Para-amino salicylic acid

574 **Table 2.** Mutations in putative efflux pump/transporter genes identified from ONT assembly of  
 575 XDR Beijing sub-lineage 2.2.1.1 strain

576

| Genes investigated                                                                                                                                                                                                                                     | Gene (mutation) identified |              |
|--------------------------------------------------------------------------------------------------------------------------------------------------------------------------------------------------------------------------------------------------------|----------------------------|--------------|
| <i>drxA, drxB, drxC, Rv0194, pstP, efpA, bacA, mmr, Rv1250, Rv1272c, Rv1273c, Rv1634, Rv1258c, mmpL13a, mmpL13b, P55, jefA, Rv0849, Rv2456c, Rv3239c, Rv2994, secA1, pstB, Rv2265, Rv1217, Rv1218c, uspA, Rv2688c, Rv1819, Rv1877, Rv1273c, Rv1458</i> | <i>Rv0194</i>              | p.Met74Thr   |
|                                                                                                                                                                                                                                                        | <i>Rv0194</i>              | p.Pro1098Leu |
|                                                                                                                                                                                                                                                        | <i>secA1</i>               | p.Asp699Glu  |
|                                                                                                                                                                                                                                                        | <i>uspA</i>                | p.Thr54Ser   |
|                                                                                                                                                                                                                                                        | <i>uspA</i>                | p.Asp67His   |
|                                                                                                                                                                                                                                                        | <i>uspA</i>                | Val127Leu    |
|                                                                                                                                                                                                                                                        | <i>glnQ</i>                | p.Met243Leu  |
|                                                                                                                                                                                                                                                        | <i>Rv1218c</i>             | p.Gln243Arg  |
|                                                                                                                                                                                                                                                        | <i>Rv1250</i>              | p.Arg278Gly  |
|                                                                                                                                                                                                                                                        | <i>Rv2688c</i>             | p.Pro156Thr  |

577

578 ONT – Oxford Nanopore Technologies; XDR - Extensively drug resistant

579

580 **Table 3:** Mutations identified in genes that encode for potential virulence proteins in the XDR

581 Beijing sub-lineage 2.2.1.1 strain

582

| <b>Gene</b>    | <b>Nucleotide change</b> | <b>Position</b> | <b>Amino acid</b> |
|----------------|--------------------------|-----------------|-------------------|
| <i>mak</i>     | T->C                     | 154283          | p.Ser18Pro        |
| <i>mce1A</i>   | T->G                     | 199470          | p.Ser313Ala       |
| <i>mce1D</i>   | T->C                     | 203038          | p.Ile188Thr       |
| <i>mce1F</i>   | T->C                     | 206339          | p.Leu370Pro       |
| <i>mce2A</i>   | T->C                     | 686972          | p.Phe51Ser        |
| <i>mce2F</i>   | A->G                     | 694531          | p.Asn432Ser       |
| <i>Rv0634c</i> | A->G                     | 731015          | p.Tyr7His         |
| <i>mazF3</i>   | G->A                     | 1230778         | p.Thr65Ile        |
| <i>ephB</i>    | G->T                     | 2191498         | p.Gly158Trp       |
| <i>mce3A</i>   | G->A                     | 2209465         | p.Ala47Thr        |
| <i>mce3F</i>   | C->A                     | 2216443         | p.Ala396Glu       |
| <i>cstA</i>    | C->A                     | 3428917         | p.Arg559Ser       |
| <i>mce4C</i>   | G->T                     | 3916386         | pArg191Ser        |
| <i>proV</i>    | T->C                     | 4204168         | p.Asn84Asp        |
| <i>proX</i>    | A->G                     | 4205120         | p.Leu85Pro        |
| <i>mycP1</i>   | T->C                     | 4364046         | Thr238Ala         |

583

584 XDR - Extensively drug resistant

585

586 **Supplementary**

587 **Fig. S1:** A scheme of workflow to generate variants from Oxford Nanopore technologies (ONT)  
588 and Illumina reads

589 **Fig. S2:** Dot plot of sequence accuracy between the draft Beijing sub-lineage 2.2.1.1 strain  
590 genome and the reference genome H37Rv. The red dots show a forward orientation while blue  
591 dots show reverse orientation

592 **Fig. S3:** Plot of sequence and depth coverage for the assembly of 168 PE/PPE family genes  
593 using Oxford minion® reads. The marks on the x-axis represent the different 168 PE/PPE family  
594 genes while y-axis respective their percentage assembly coverage (red), and read depth (blue).  
595 Sample was sequenced to an average of 273x depth

596 **Fig. S4:** Plot of sequence and depth coverage for the assembly of 168 PE/PPE family genes  
597 using Illumina reads. The marks on the x-axis represent the different 168 PE/PPE family genes  
598 while y-axis respective their percentage assembly coverage (red), and read depth (blue). Sample  
599 was sequenced to average 46.3x depth

600 **Fig. S5:** Dot plot of ‘unique region’ accuracy between the draft Beijing sub-lineage 2.2.1.1 strain  
601 (x-axis) genome and one of the Beijing reference genomes assembled from PacBio reads (y-  
602 axis), genbank accession number AP018035 (HN-321).

603 **Fig. S6:** Protein structure of the PPE family protein predicted using Phyre2 for a 654bp gene  
604 sequence with an end 323bp insertion identified within the assembled genome but absent in the  
605 reference genome H37Rv.



606 **Table S1:** Details of Oxford Nanopore Technologies (ONT) reads utilized and assembled

607 genome

608 **Table S2:** Number of SNPs and average base coverage identified from different assembled

609 PE/PPE family genes from ONT and Illumina reads

610 **Table S3:** Mutations in genes involved in cell wall biosynthesis identified in the Beijing sub-

611 lineage 2.2.1.1 strain

612 **Table S4:** Blast search results of the gene sequence with insertion confirming the uniqueness of

613 insertion sequence among lineage 2 genomes

614
